# Supplementary material
Source: publisher figshare collection journal article supplement (https://acs.figshare.com/ndownloader/files/3858193)
Supplement: Supplementary file 1 [file 3858193]

---

## Supporting Information

### Identification of multi-functional graphene-gold nano composite for environment-friendly enriching, separating and detecting $\text{Hg}^{2+}$ simultaneously

Zhengquan Yan,<sup>a,b</sup> Hongtao Xue,<sup>b</sup> Karsten Berning,<sup>c</sup> Yun-Wah Lam<sup>c</sup>, Chun-Sing Lee<sup>b\*</sup>

<sup>a</sup>Anhui Provincial Laboratory of Biomimetic Sensor and Detecting Technology & Solar Photovoltaic Materials

Research Center, West Anhui University, Lu'an 237012, China

<sup>b</sup>Center of Super-Diamond and Advanced Films (COSDAF) & Dept. of Phys. and Mater. Sci., City University of

Hong Kong, Hong Kong, *E-mail: apcslee@cityu.edu.hk*

<sup>c</sup>Dept. of Biology and Chemistry, City University of Hong Kong, Hong Kong

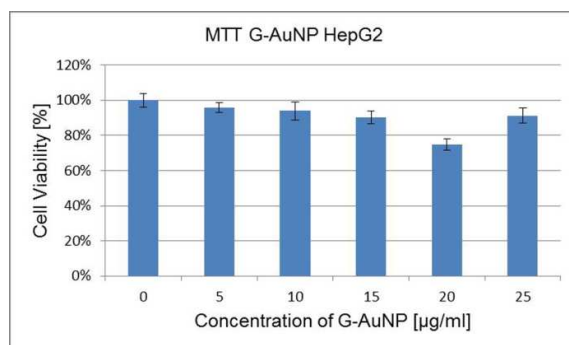

**Figure S1** Cytotoxicity of G-AuNPs to a series of mammalian cell lines of HepG2

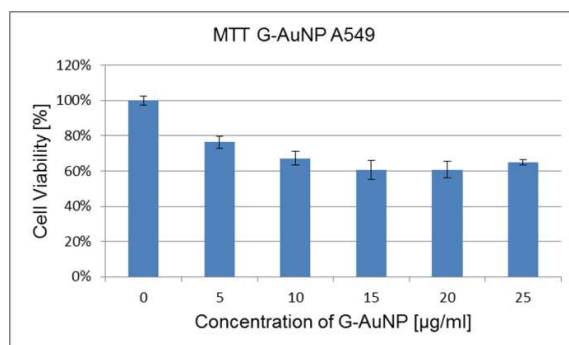

**Figure S2** Cytotoxicity of G-AuNPs to a series of mammalian cell lines of A549

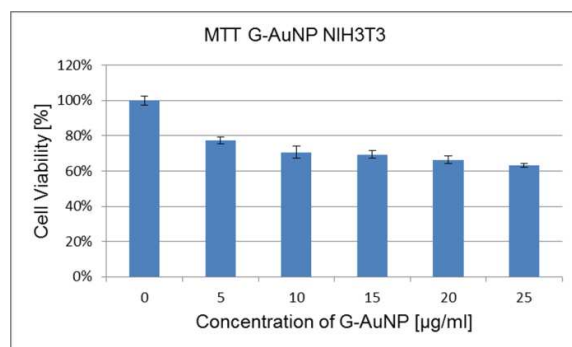

**Figure S3** Cytotoxicity of G-AuNPs to a series of mammalian cell lines of NIT3T3
